# Supplementary material for: Structural basis for the oligomerization-mediated regulation of NLRP3 inflammasome activation
Source: PubMed Central journal article supplement — Proc Natl Acad Sci U S A. 2022 Mar 7;119(11):e2121353119. doi: 10.1073/pnas.2121353119 (PMC8931350; doi:10.1073/pnas.2121353119), 2022-03-07
Supplement: pnas.2121353119.sapp.pdf [file pnas.2121353119.sapp.pdf]

## **Supplementary information for**

# **Structural basis for the oligomerization-mediated regulation of NLRP3**

## **inflammasome activation**

### **Authors**

Umeharu Ohto<sup>1,2\*</sup>, Yukie Kamitsukasa<sup>1,2</sup>, Hanako Ishida<sup>1,2</sup>, Zhikuan Zhang<sup>1,2</sup>, Karin Murakami<sup>1</sup>, Chie Hirama<sup>1</sup>, Sakiko Maekawa<sup>1</sup>, and Toshiyuki Shimizu<sup>1\*</sup>

### **Affiliations**

1. Graduate School of Pharmaceutical Sciences, The University of Tokyo, 7-3-1 Hongo, Bunkyo-ku, Tokyo 113-0033, Japan

2. These authors contributed equally to this work

### **\*Corresponding author:**

Umeharu Ohto (U.O.)

E-mail: umeji@mol.f.u-tokyo.ac.jp

Toshiyuki Shimizu (T.S.)

E-mail: shimizu@mol.f.u-tokyo.ac.jp

### **This PDF file includes:**

Figures S1-S7

Table S1

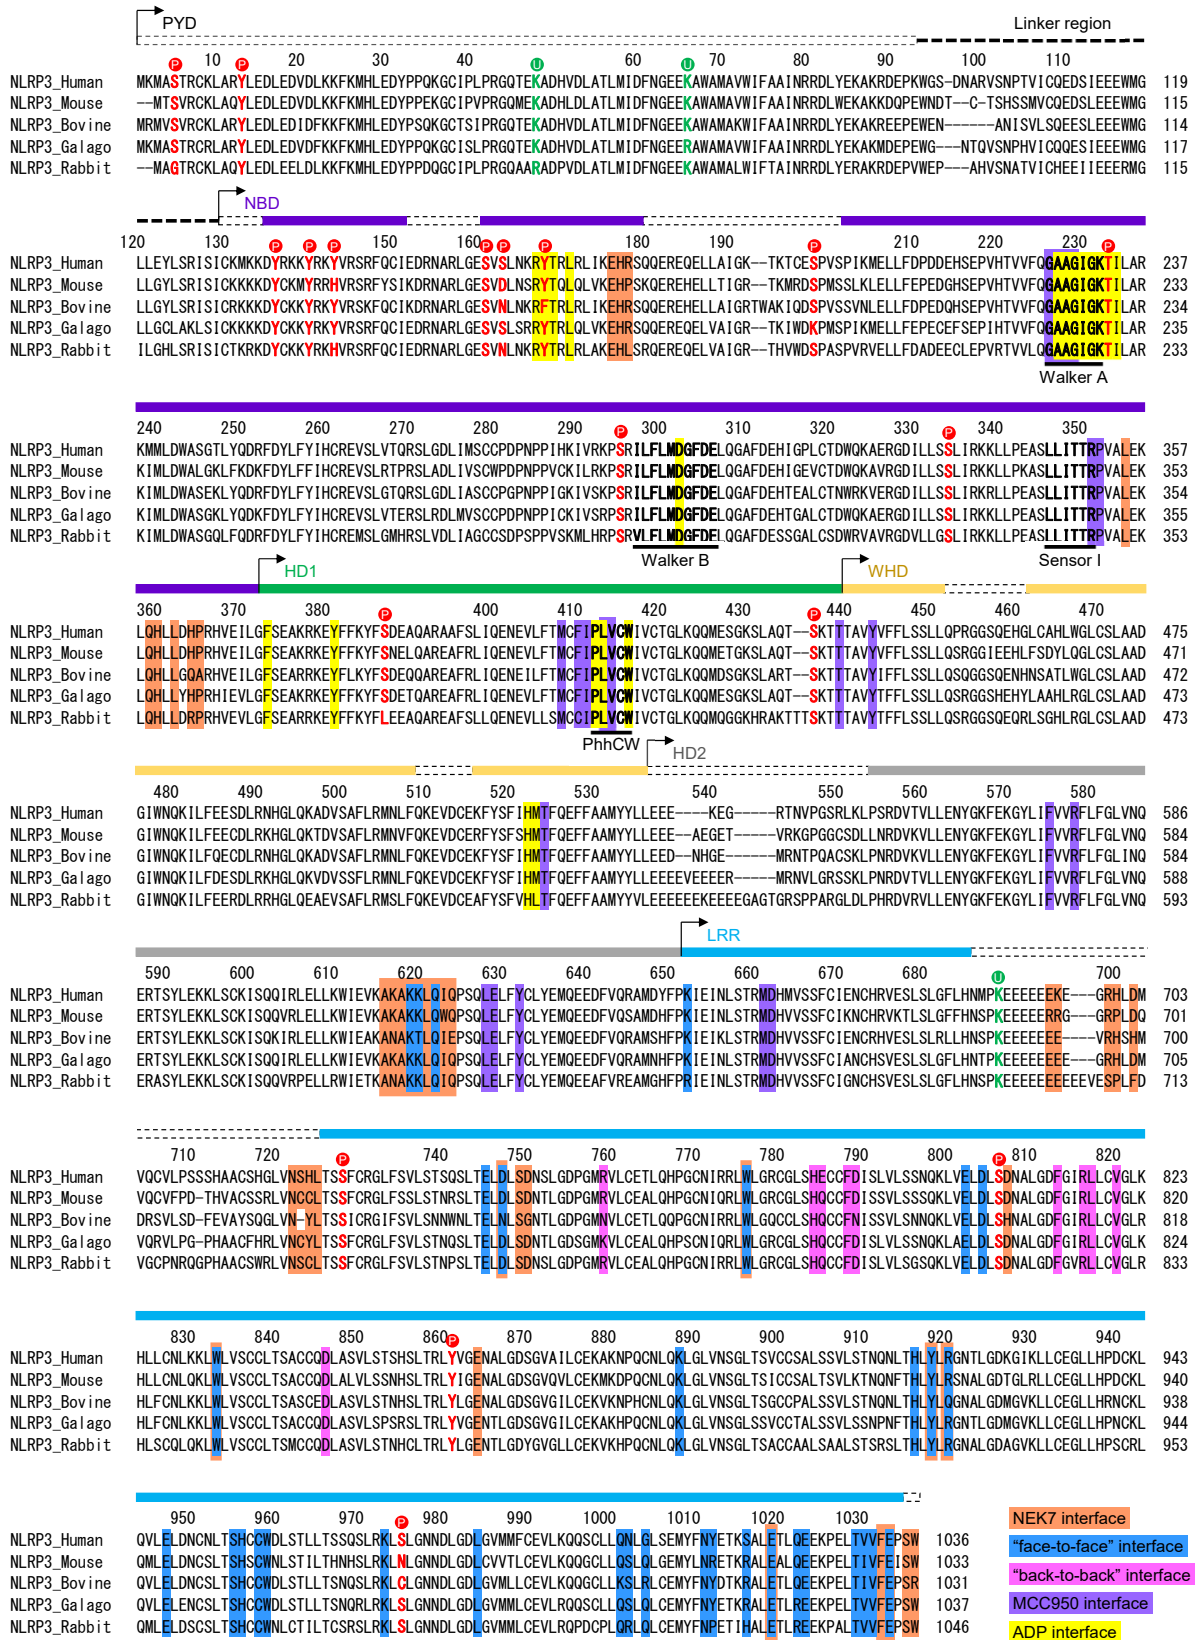

**Fig. S1.** Sequence alignment of NLRP3

Sequence alignment of human, mouse, rabbit, and galago NLRP3 were calculated using Clustal Omega. The Walker A, Walker B, Sensor I, PhhCW motifs are indicated. The interface residues for ADP, MCC950, NEK7 (PDB 6NPY), the "face-to-face" interface, and the "back-to-back" interface are highlighted in yellow, magenta, orange, blue, and pink, respectively. The known phosphorylation and ubiquitination sites are shown in red and green, respectively.

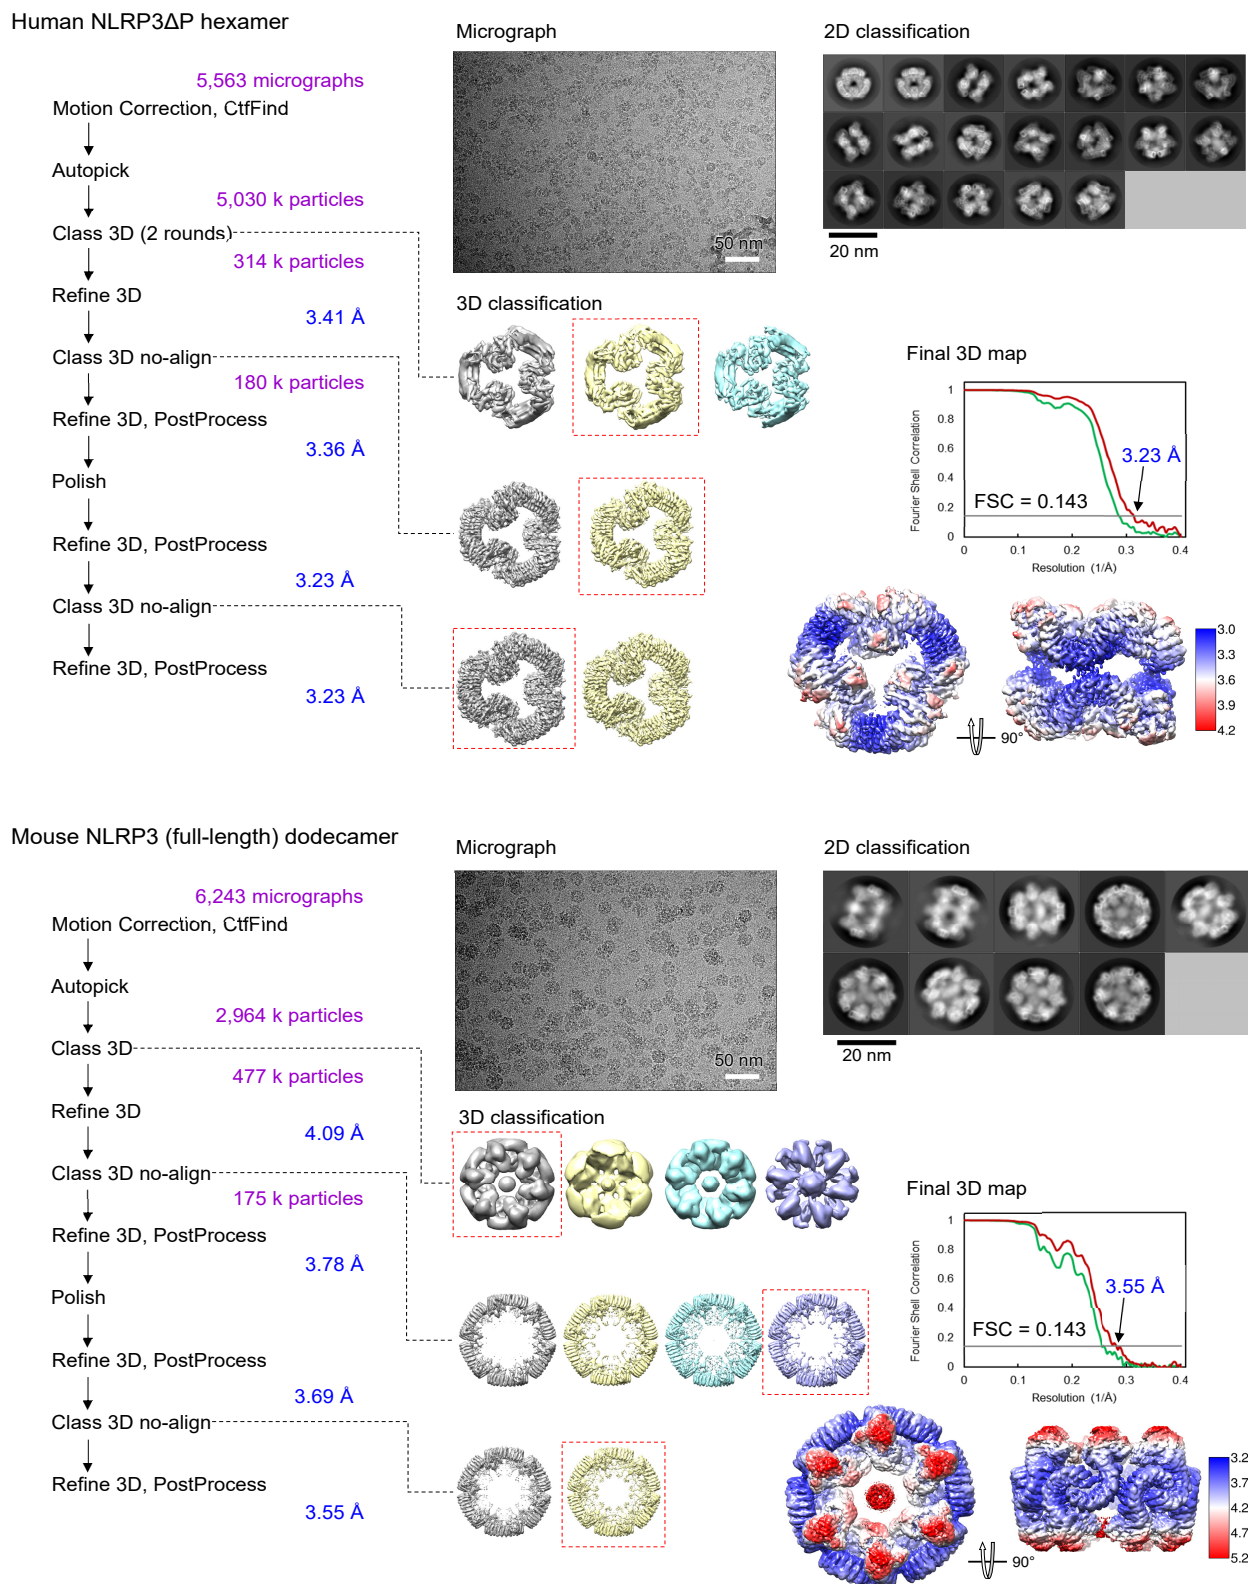

**Fig. S2.** Cryo-EM analysis of the NLRP3 oligomer

Data processing workflow of the human NLRP3 $\Delta$ P hexamer (top) and the mouse NLRP3 dodecamer (bottom). Representative motion-corrected micrograph, 2D class averages, 3D class-averages, gold-standard FSC curves of the final 3D reconstruction (resolution cut-off at FSC = 0.143), and the final 3D map (colored according to the local resolution) are shown. 2D class averages were calculated using the refined particles that were used for the final reconstruction. 3D classes selected for the following analyses are indicated with red dotted boxes.

**a** Human NLRP3 $\Delta$ P hexamer

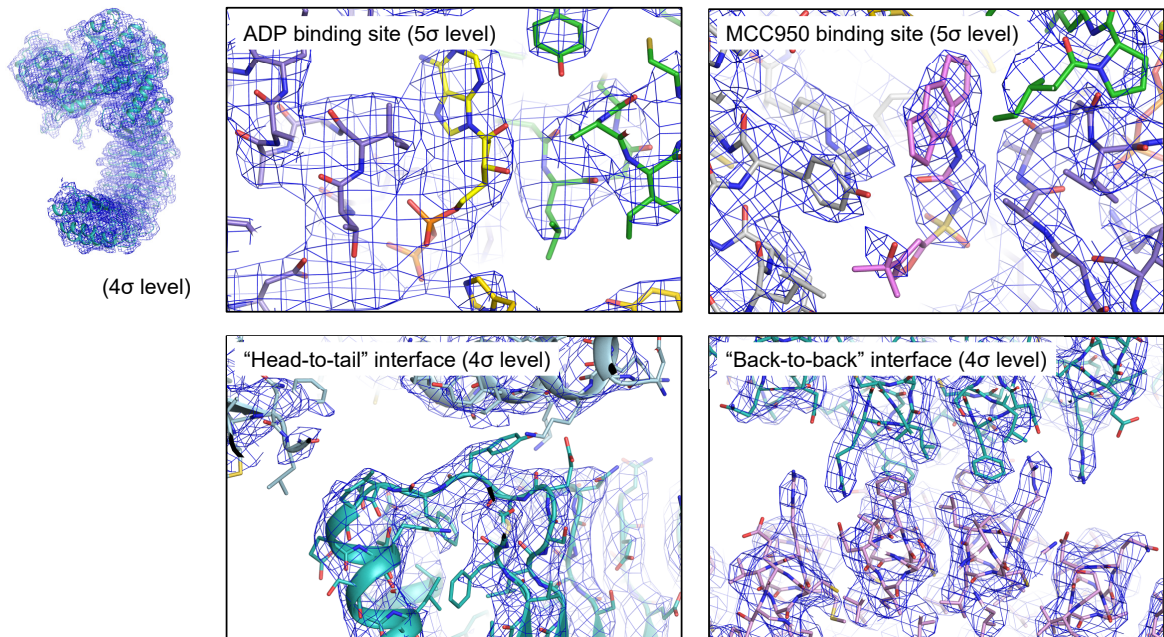

**b** Mouse NLRP3 (full-length) dodecamer

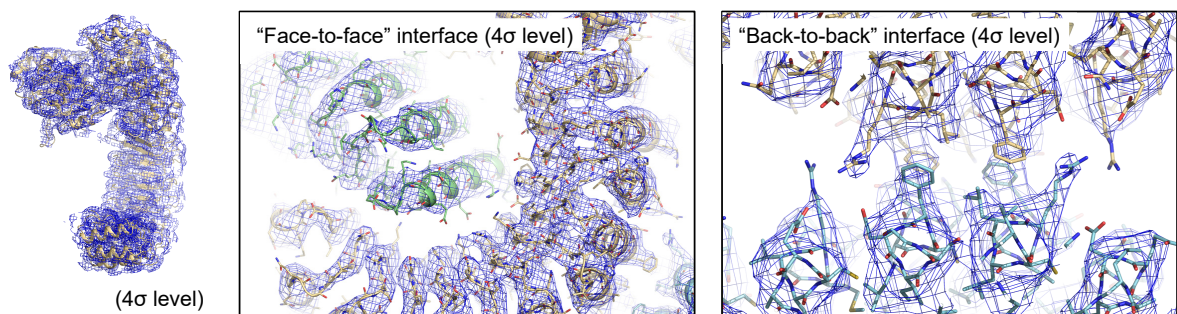

**Fig. S3.** Cryo-EM density maps of the NLRP3 oligomer  
Representative cryo-EM density maps of the human NLRP3 $\Delta$ P hexamer (**a**) and the mouse NLRP3 dodecamer (**b**). The map levels are indicated in each panel.



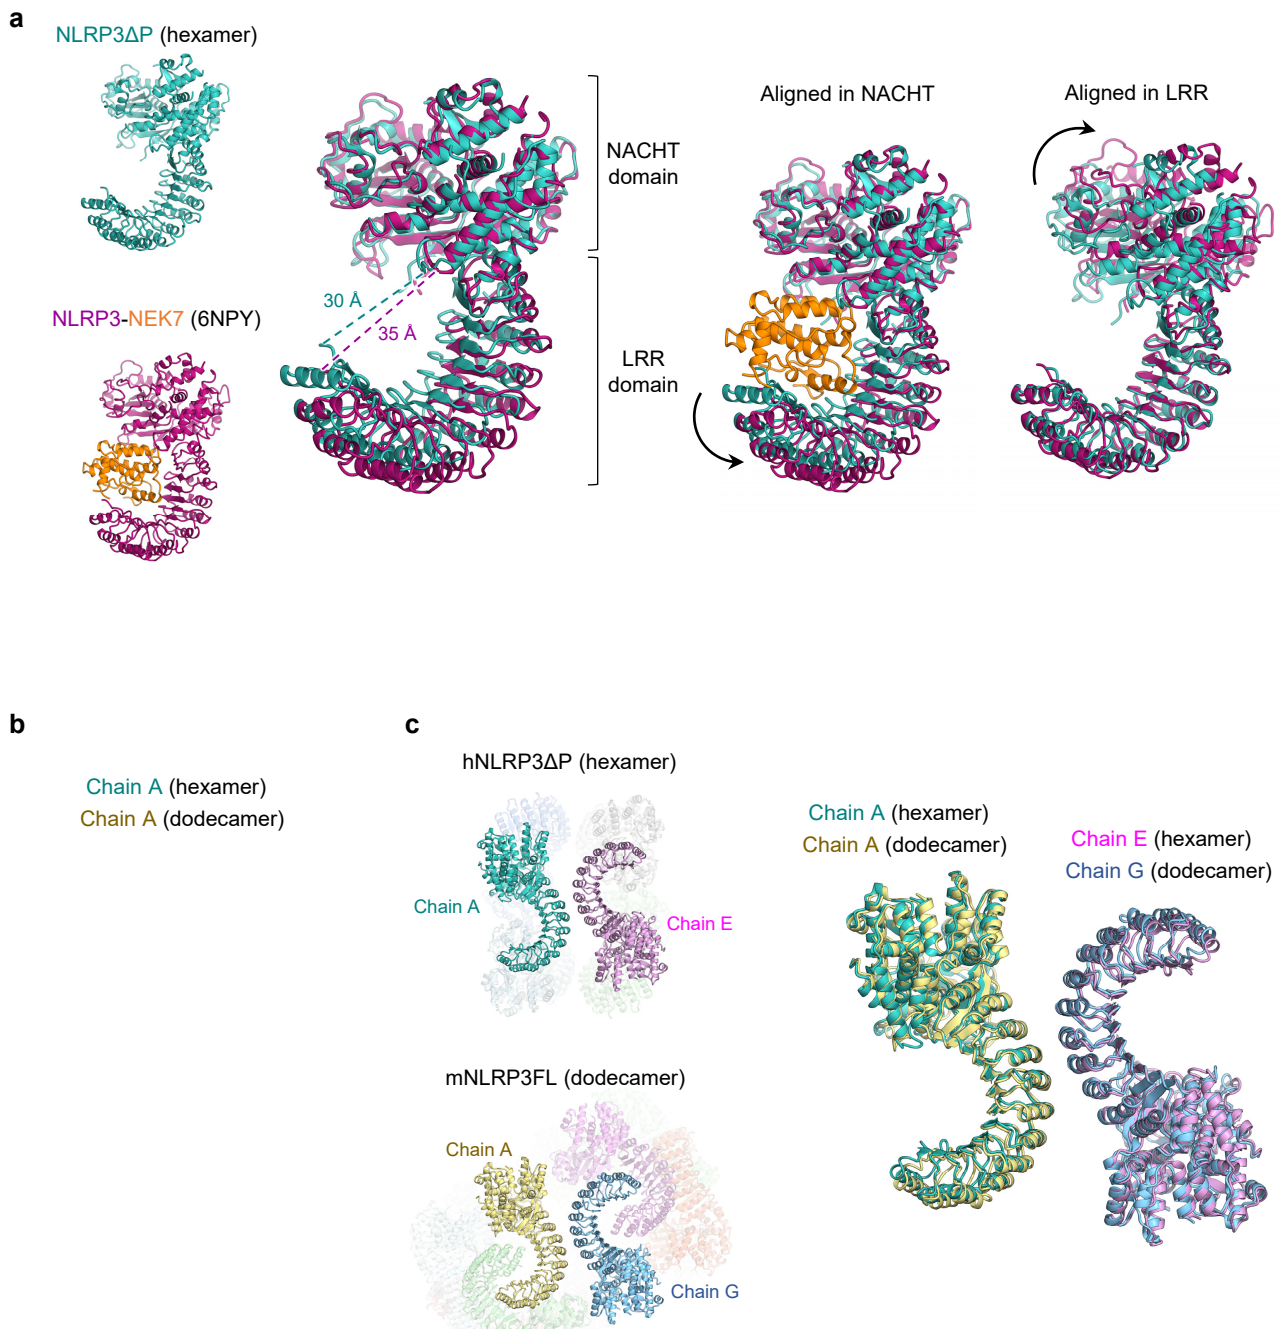

**Fig. S4.** Structural comparison of inactive form of NLRP3

**a**, Structural comparison between the protomer in the NLRP3 $\Delta$ P hexamer (this study) and NLRP3 $\Delta$ P-NEK7 complex (PDB 6NPY) <sup>1</sup>.

**b**, Structural comparison between the protomers in the human NLRP3 $\Delta$ P hexamer and in the mouse NLRP3 dodecamer.

**c**, Structural comparison of the “back-to-back” interfaces in the human NLRP3 $\Delta$ P hexamer and in the mouse NLRP3 dodecamer.

### Human NLRP3 $\Delta$ P (hexamer)

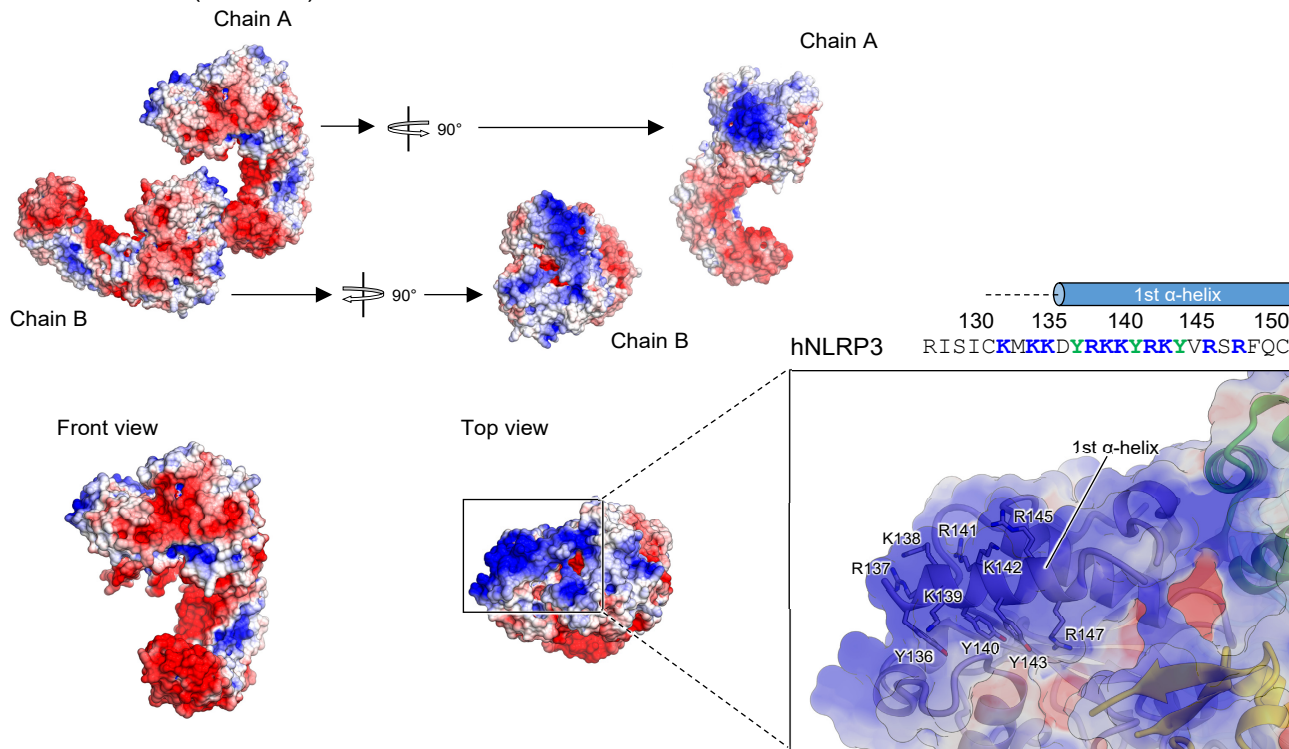

### Mouse NLRP3 (full-length) (dodecamer)

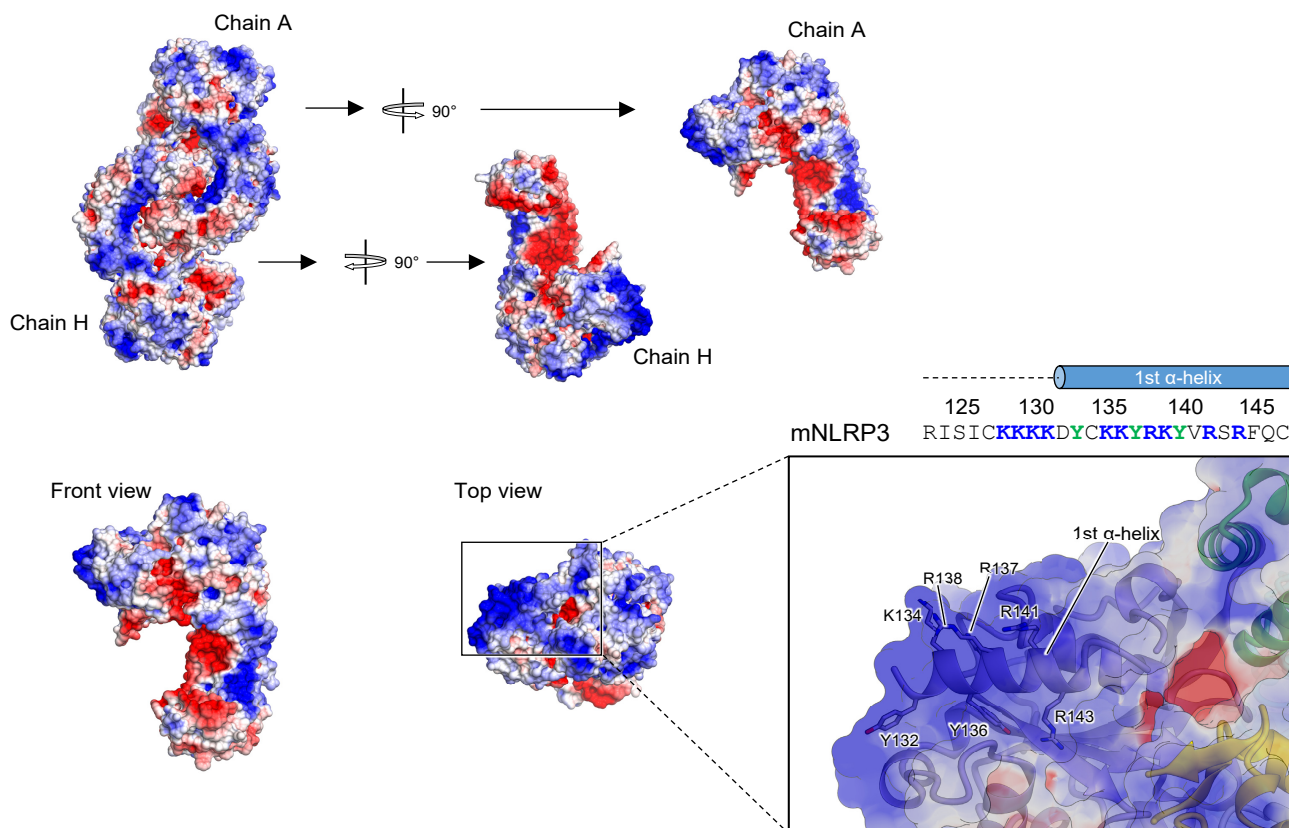

**Fig. S5.** Electrostatic surface potentials of NLRP3

The electrostatic surface potentials of the “head-to-tail” dimer and protomer in the human NLRP3 $\Delta$ P hexamer (top) and the “face-to-face” dimer and protomer in the mouse NLRP3 dodecamer (bottom) are shown. The residues in the polybasic region are highlighted in the right panels.

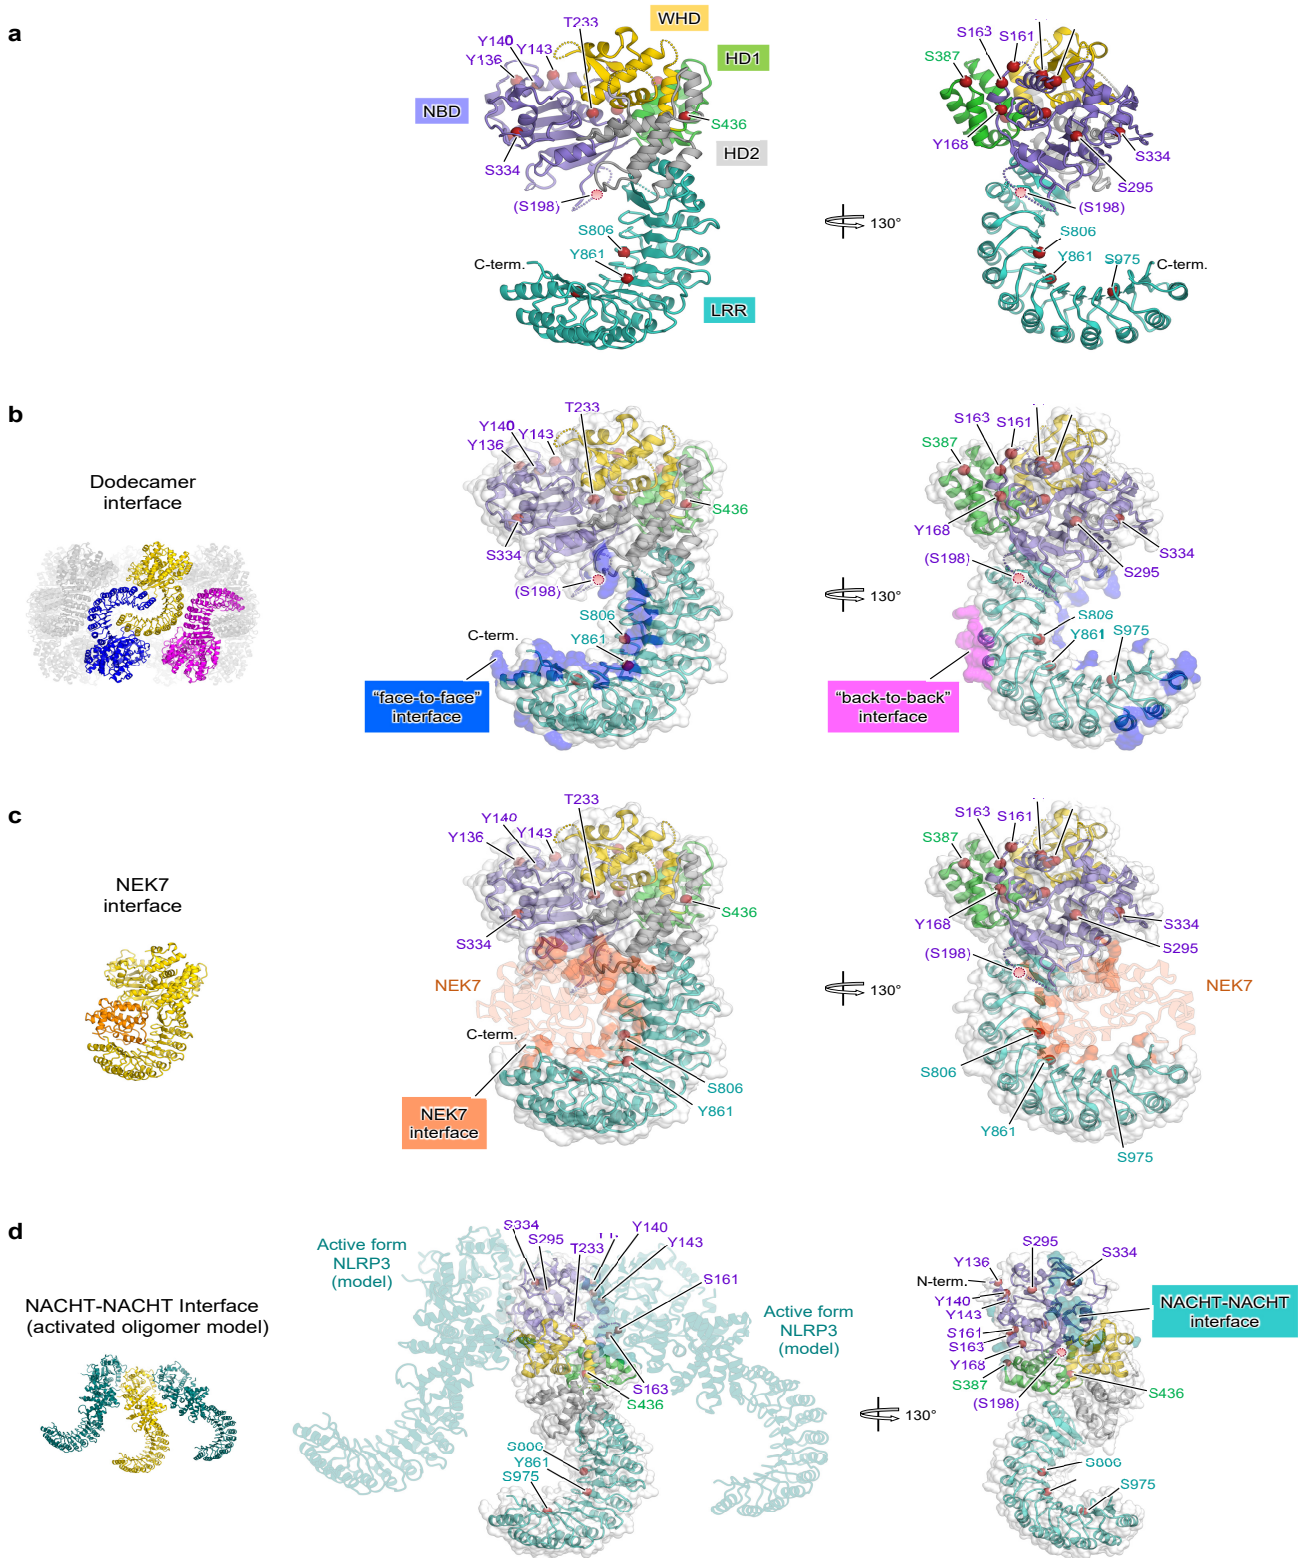

**Fig. S6.** Phosphorylation sites of NLRP3

Known phosphorylation sites of NLRP3 are mapped onto the protomer structure of human NLRP3 $\Delta$ P hexamer (**a**, **b**), NLRP3-NEK7 complex (PDB 6NPY)<sup>1</sup> (**c**), and the hypothetical activated form of NLRP3 (**d**). The phosphorylation sites are indicated with red spheres. The “face-to-face” interface (**b**), “back-to-back” interface (**b**), NEK7-binding interface (**c**), and NACT-NACT interface between adjacent protomers in the hypothetical activated oligomer of NLRP3 (**d**) are shown in blue, pink, orange, and green semitransparent surfaces, respectively.



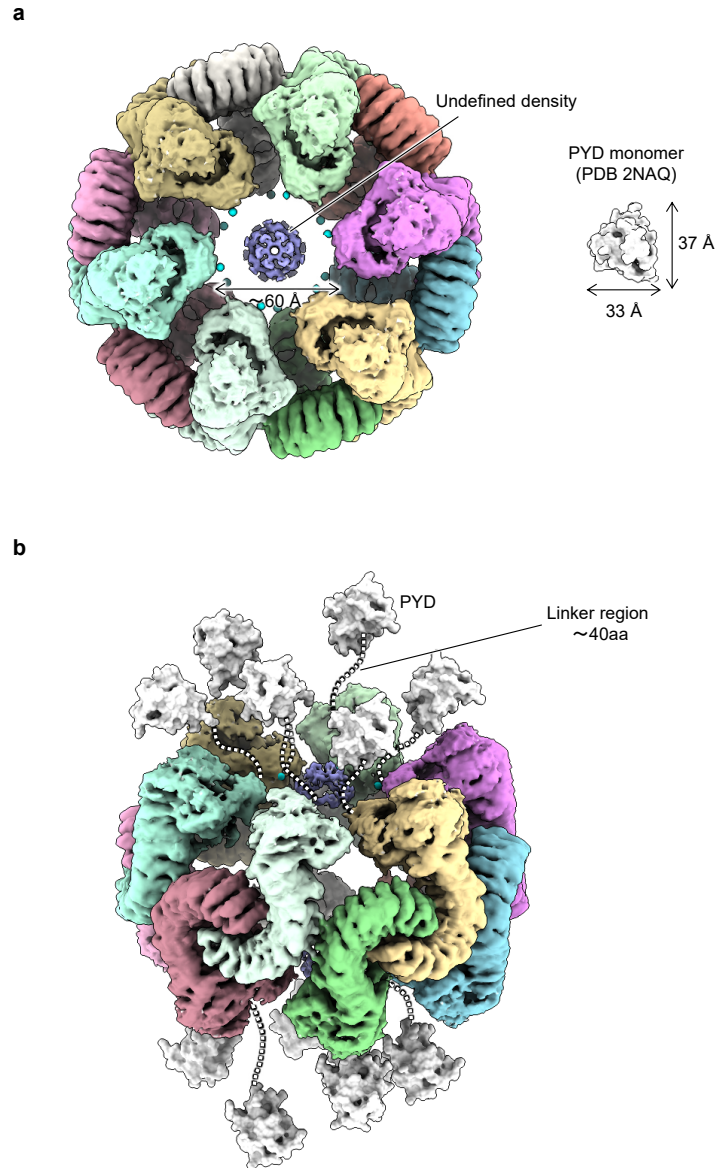

**Fig. S7.** NLRP3 dodecamer model containing PYD.

**a**, Cryo-EM map of the full-length mouse NLRP3 dodecamer (left) and surface representation of PYD monomer (PDB 2NAQ) (right). Each protomer is shown in a different color. The position of the N-terminus of each protomer in the current model (D131) is shown in the green sphere.

**b**, NLRP3 dodecamer model containing PYD. The PYDs (white surface representations) and the following linker regions (dashed lines) are not resolved in the cryo-EM map but tentatively positioned for the visualization purpose.



**Table S1. Statistics for data collection and structural refinement**

| <b>Data</b>                                                     | Human NLRP3 $\Delta$ P<br>hexamer | Mouse NLRP3<br>dodecamer |
|-----------------------------------------------------------------|-----------------------------------|--------------------------|
| <b>EMDB ID</b>                                                  | EMD-32119                         | EMD-32120                |
| <b>PDB ID</b>                                                   | 7VTP                              | 7VTQ                     |
| <b>Data collection and processing</b>                           |                                   |                          |
| Microscope / Voltage (kV)                                       | Titan Krios G4, 300               |                          |
| Detector                                                        | K3 (CDS mode)                     | K3 (CDS mode)            |
| Magnification                                                   | 105,000                           |                          |
| Pixel size (Å)                                                  | 0.83                              |                          |
| Total dose (e <sup>-</sup> /Å <sup>2</sup> ) / Frames per movie | 68 / 64                           | 68 / 64                  |
| Total movie stacks                                              | 5,563                             | 6,243                    |
| Final particle images (no.)                                     | 105,139                           | 73,930                   |
| Symmetry imposed                                                | D3                                | D6                       |
| Map resolution (Å)                                              | 3.23                              | 3.55                     |
| FSC threshold                                                   | 0.143                             | 0.143                    |
| Map sharpening B factor (Å <sup>2</sup> )                       | -84.9                             | -138.3                   |
|                                                                 |                                   |                          |
| <b>Refinement</b>                                               |                                   |                          |
| Software                                                        | COOT, Chimera, Phenix             |                          |
| Model resolution (Å)<br>FSC threshold=0.143 / 0.50              | 3.2 / 3.5                         | 3.5 / 4.1                |
| Model composition                                               |                                   |                          |
| Protein chains                                                  | 6                                 | 12                       |
| Residues                                                        | 4,770                             | 9,468                    |
| Average B-factors (Å <sup>2</sup> )                             | 109.1                             | 62.5                     |
| R.m.s deviations                                                | -                                 |                          |
| Bond lengths (Å)                                                | 0.003                             | 0.003                    |
| Bond angles (°)                                                 | 0.64                              | 0.64                     |
| Validation                                                      |                                   |                          |
| Molprobity score                                                | 1.73                              | 2.03                     |
| Clash score                                                     | 11.46                             | 13.91                    |
| Poor rotamers (%)                                               | 0.09                              | 0.05                     |
| Ramachandran plot                                               |                                   |                          |
| Favored (%)                                                     | 97.1                              | 94.4                     |
| Allowed (%)                                                     | 2.7                               | 5.6                      |
| Outliers (%)                                                    | 0.2                               | 0.0                      |
